# Supplementary material for: An Improved Equilibrium Optimizer for Optimal Placement of Distributed Generators in Distribution Systems considering Harmonic Distortion Limits
Source: Hindawi journal article supplement (doi:10.1155/2022/3755754), 2022-01-01
Supplement: f1 [file 3755754.f1.docx]

**Supplementary Materials**

**Table S1**: The optimal location and sizing of DGUs of implemented methods in IEEE 33-bus distribution system

| **Applied method** | **The optimal solution**  **(Bus – Size)** | **Total capacity** |
| --- | --- | --- |
|  |
| GA [34] | Bus 11 - 1.5000 MW; Bus 29 - 0.4228 MW; Bus 30 - 1.0714 MW | 2.9942 MW |
| PSO [34] | Bus 08 - 1.1768 MW; Bus 13 - 0.9816 MW; Bus 32 - 0.8297 MW | 2.9881 MW |
| GA-PSO [34] | Bus 11 - 0.9250 MW; Bus 16 - 0.8630 MW; Bus 32 - 1.2000 MW | 2.9880 MW |
| LSF-SA [35] | Bus 06 - 1.1124 MW; Bus 18 - 0.4874 MW; Bus 30 - 0.8679 MW | 2.4677 MW |
| BFOA [36] | Bus 17 - 0.6335 MW; Bus 18 - 0.0908 MW; Bus 33 - 0.9470 MW | 1.6713 MW |
| BSOA [37] | Bus 13 - 0.6320 MW; Bus 28 - 0.4860 MW; Bus 31 - 0.5500 MW | 1.6680 MW |
| ABC | Bus 15 - 0.7180 MW; Bus 26 – 1.0063 MW; Bus 31 - 0.4146 MW | 2.1389 MW |
| SSA | Bus 6 – 1.1400 MW; Bus 13 - 0.6584 MW; Bus 31 - 0.4416 MW | 2.2400 MW |
| EO | Bus 6 – 1.0794 MW; Bus 13 - 0.6846 MW; Bus 31 - 0.4514 MW | 2.2154 MW |
| IEO | Bus 6 – 1.1474 MW; Bus 15 - 0.6153 MW; Bus 31 - 0.4514 MW | 2.2141 MW |

**Table S2**: The optimal location and sizing of DGUs of implemented methods in IEEE 69-bus distribution system

| **Applied method** | **The optimal solution**  **(Bus – Size)** | **Total capacity** |
| --- | --- | --- |
|  |
| MOBA [27] | Bus 23 - 0.4000 MW; Bus 61 - 1.2000 MW; Bus 64 - 0.4000 MW | 2.0000 MW |
| GA [34] | Bus 21 - 0.9297 MW; Bus 62 - 1.0752 MW; Bus 64 - 0.9925 MW | 2.9974 MW |
| PSO [34] | Bus 17 - 0.9925 MW; Bus 61 - 1.1998 MW; Bus 63 - 0.7956 MW | 2.9879 MW |
| GA-PSO [34] | Bus 21 - 0.9105 MW; Bus 61 - 1.1926 MW; Bus 63 - 0.8849 MW | 2.9880 MW |
| LSF-SA [35] | Bus 18 - 0.4204 MW; Bus 60 - 1.3311 MW; Bus 65 - 0.4298 MW | 2.1813 MW |
| BFOA [36] | Bus 27 - 0.2954 MW; Bus 61 - 1.3451 MW; Bus 65 - 0.4476 MW | 2.0881 MW |
| HSA [38] | Bus 63 - 1.3024 MW; Bus 64 - 0.3690 MW; Bus 65 - 0.1018 MW | 1.7732 MW |
| ABC | Bus 17 – 0.4054 MW; Bus 61 – 1.5870 MW; Bus 69 – 0.1032 MW | 2.0956 MW |
| SSA | Bus 17 – 0.4205 MW; Bus 61 – 1.2291 MW; Bus 64 – 0.4236 MW | 2.0732 MW |
| EO | Bus 17 – 0.4325 MW; Bus 61 – 1.2943 MW; Bus 64 - 0.3672 MW | 2.0940 MW |
| IEO | Bus 18 – 0.4260 MW; Bus 61 – 1.3765 MW; Bus 64 - 0.2896 MW | 2.0921 MW |

**Table S3**: The optimal location and sizing of DGUs of implemented methods in IEEE 85-bus distribution system

| **Applied method** | **The optimal solution**  **(Bus – Size)** | **Total capacity** |
| --- | --- | --- |
|  |
| ABC | Bus 11 – 0.4712 MW; Bus 36 – 0.7794 MW; Bus 68 - 0.5992 MW | 1.8498 MW |
| SSA | Bus 11 – 0.4478 MW; Bus 34 – 0.8455 MW; Bus 67 - 0.6124 MW | 1.9057 MW |
| EO | Bus 11 – 0.5631 MW; Bus 35 – 0.7271 MW; Bus 67 - 0.6283 MW | 1.9185 MW |
| IEO | Bus 11 – 0.5312 MW; Bus 34 – 0.8198 MW; Bus 67 - 0.5980 MW | 1.9490 MW |
